# Supplementary material
Source: PubMed Central journal article supplement (PMC3658171)
Supplement: NIHMS459973-supplement-459973Table2.pdf [file NIHMS459973-supplement-459973Table2.pdf]

## Electronic Supplementary Material

**ESM Table 1. Primer sequences used for quantitative PCR**

| <b>Gene</b>                         | <b>Primer Sequence</b>                                                             |
|-------------------------------------|------------------------------------------------------------------------------------|
| Fibroblast growth factor 21 (FGF21) | forward 5'-ACCTGGAGATCAGGGAGGAT -3'<br>reverse, 5' GTCCTCCAGCAGCAGTTCTC-3'         |
| TATA-box binding protein TBP)       | forward 5'-CACTGCTGTTGGTGATTGTTGGTTT-3'<br>reverse 5'-TGGGAAGGCGGAATGTATCTGGCA -3' |
