# Supplementary material
Source: PubMed Central journal article supplement (PMC3658171)

ESM Figure 1.  
Patient flow chart

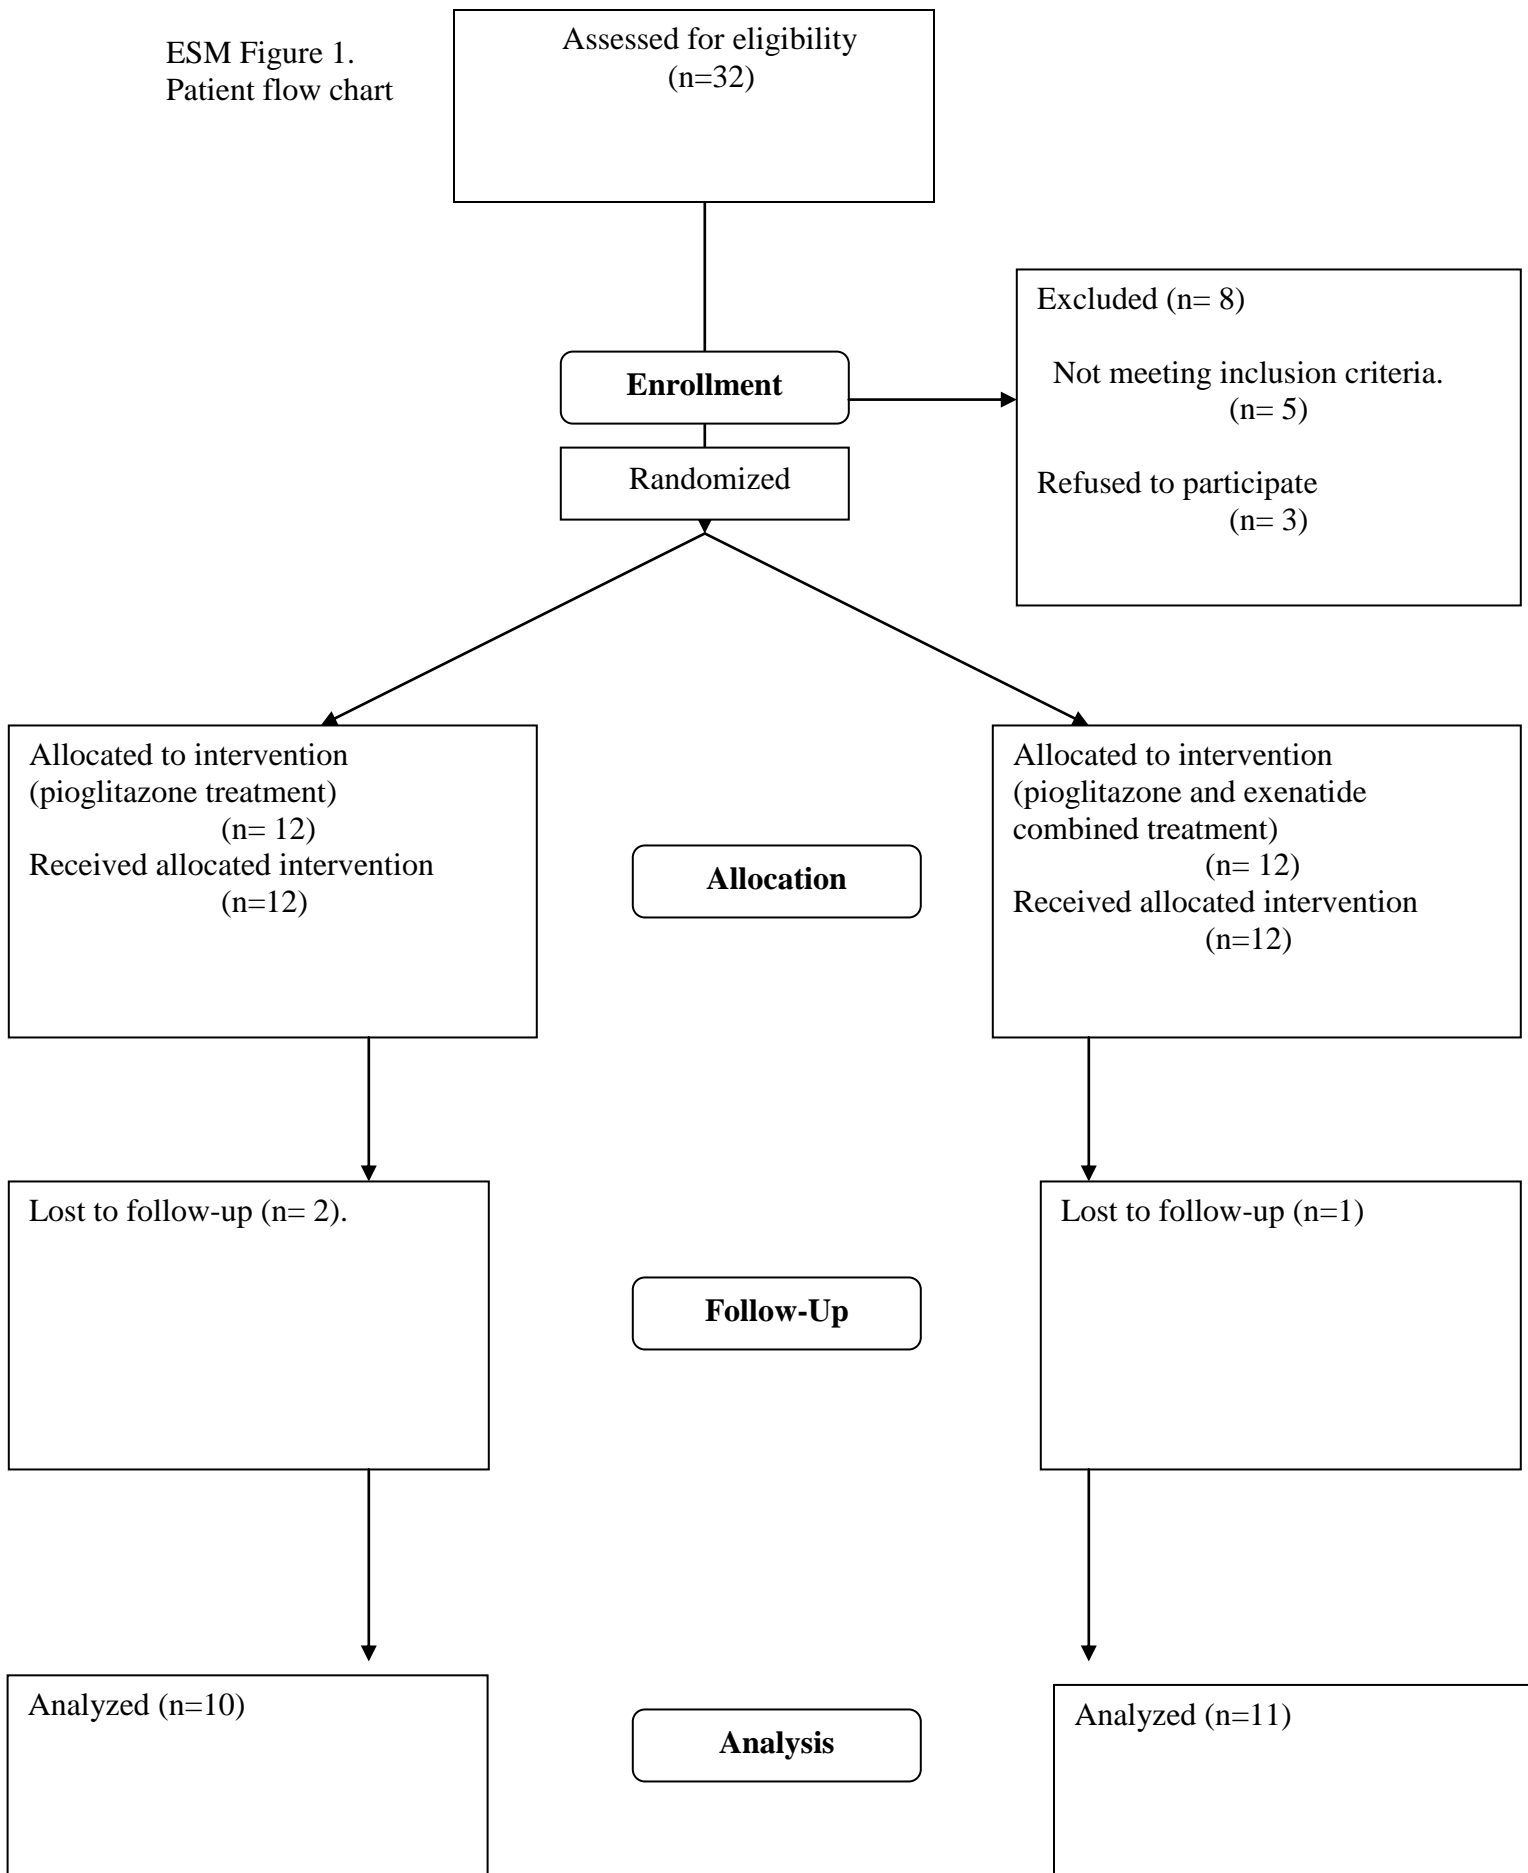

Supplement: NIHMS459973-supplement-459973Table1.pdf [file NIHMS459973-supplement-459973Table1.pdf]
